# Supplementary material for: Gyroidal mesoporous multifunctional nanocomposites via atomic layer deposition
Source: Royal Society of Chemistry journal article supplement (doi:10.1039/c4nr01948b), 2014-06-09
Supplement: c4nr01948b1.pdf [file c4nr01948b1.pdf]

## Supporting Information

### Gyroidal Mesoporous Multifunctional Nanocomposites *via* Atomic Layer Deposition

Jörg G. Werner<sup>1</sup>, Maik R. J. Scherer<sup>2</sup>, Ulrich Steiner<sup>2</sup>, Ulrich Wiesner<sup>1</sup>

<sup>1</sup>Department of Materials Science and Engineering, Cornell University, Ithaca NY, USA

<sup>2</sup>Cavendish Laboratory, Department of Physics, University of Cambridge, Cambridge, UK

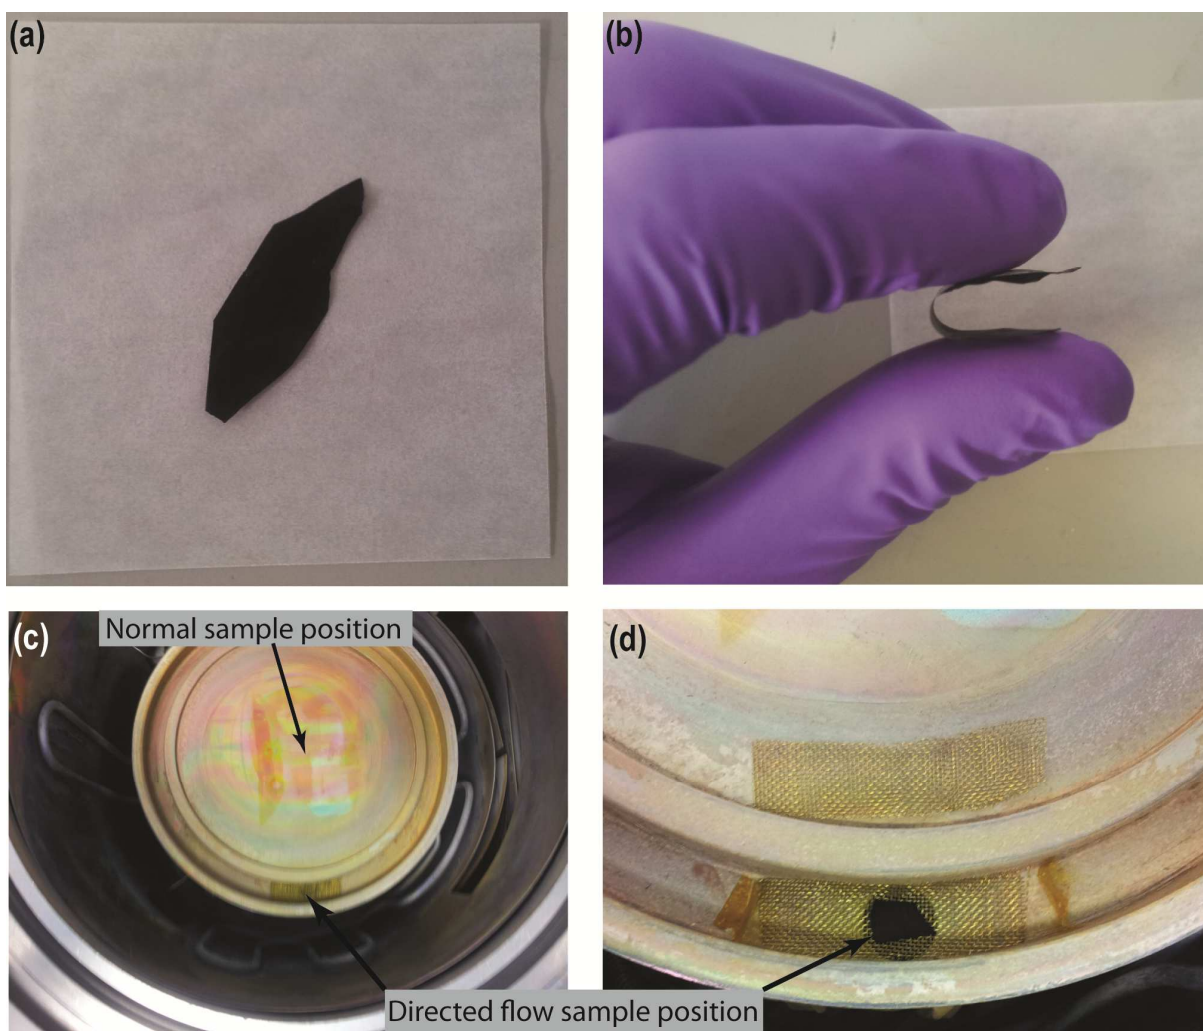

**Figure S1.** Photographs of a large, flexible gyroidal mesoporous resin template (a+b) and of the Beneq TFS200 ALD system used for part of the samples described in this report, indicating the sample position for the normal "flow over" and the "directed flow" procedure.
